# Supplementary material for: Risky decision-making and affective features of impulse control disorders in Parkinson’s disease
Source: J Neural Transm (Vienna). 2017 Nov 8;125(2):131–43. doi: 10.1007/s00702-017-1807-7 (PMC5775350; doi:10.1007/s00702-017-1807-7)
Supplement: Supplementary file 1 — Dataset and codebook are available in the supplementary materials. (XLSX 49 kb) [file 702_2017_1807_MOESM1_ESM.xlsx]

## Sheet: Data
Code	Group	Age	Sex	Education (y)	ESS	WTAR	CAMCOG total	CAMCOG total_log	Marital status	cigarettes	alcohol	FH_Alcohol	FH_ICD	FH_Drug	Age at PD onset	PD duration	UPDRS-III	UPDRS-IV	HY	LEDD	Dag_use	BART_overall	BART_Pre	BART_Post	BART_DS	TMT-A	Divided Attention	Divided Attention_log	TMT-B	Hayling SS1	CAMCOG_EF	Kirby	Go-NoGo	Hayling SS2	Z_CAMCOG_memory	Z_LM1	Z_LM2	Memory_composite	Brixton	HADS	HADS_sqr	HADS-A	HADS-D	SAS	BIS-11
ICDHC01	1	73	1	20	5	125	100	0.6	5	0	9	0	0	0	-9999	-9999	-9999	-9999	-9999	-9999	-9999	35.87	43.86	31.28	12.58	1	28	0.7	1	6	24	0.63	1	6	1.46	-0.16	-0.25	0.35	6	0	0	0	0	2	45
ICDHC02	1	72	2	18	11	118	97	0.85	1	0	9	0	0	0	-9999	-9999	-9999	-9999	-9999	-9999	-9999	31.13	36.8	33.2	3.6	0	30	0.48	0	6	24	0.56	0	5	-0.47	-0.46	-0.25	-0.39	10	4	2	1	3	12	67
ICDHC05	1	67	1	18	9	125	103	0	1	0	7.5	0	0	0	-9999	-9999	-9999	-9999	-9999	-9999	-9999	34.38	37.5	35.63	1.88	0	31	0.3	0	6	28	0.67	0	6	0.97	2.24	2.38	1.87	7	5	2.24	4	1	9	54
ICDHC06	1	71	1	17	3	118	99	0.7	1	0	4	0	0	0	-9999	-9999	-9999	-9999	-9999	-9999	-9999	12.43	13.5	11	2.5	0	30	0.48	0	6	25	0.37	0	6	0.01	0.14	-0.13	0.01	7	0	0	0	0	9	37
ICDHC07	1	77	1	10	7	118	98	0.78	1	0	0	0	0	0	-9999	-9999	-9999	-9999	-9999	-9999	-9999	21.12	22	18.5	3.5	0	25	0.9	1	4	21	0.44	2	6	0.49	0.74	0.88	0.7	1	1	1	1	0	12	55
ICDHC08	1	66	2	11	5	120	101	0.48	1	0	8	-9999	-9999	-9999	-9999	-9999	-9999	-9999	-9999	-9999	-9999	40.53	44	42	2	0	31	0.3	0	6	26	0.48	0	6	0.01	0.14	0.88	0.34	7	8	2.83	7	1	14	75
ICDHC10	1	71	2	14	4	116	98	0.78	3	0	0	0	0	0	-9999	-9999	-9999	-9999	-9999	-9999	-9999	32.92	38.25	31.75	6.5	0	30	0.48	0	6	21	0.22	0	6	0.49	0.44	0.13	0.35	3	7	2.65	5	2	8	43
ICDHC12	1	73	1	17	10	118	95	0.95	5	0	0	0	0	0	-9999	-9999	-9999	-9999	-9999	-9999	-9999	34.09	47.66	32	15.66	1	25	0.9	3	6	21	0.52	2	6	0.01	0.44	-0.25	0.07	4	5	2.24	4	1	6	57
ICDHC13	1	67	1	13	8	120	103	0	1	0	4	0	0	0	-9999	-9999	-9999	-9999	-9999	-9999	-9999	37.16	40.5	34	6.5	0	32	0	0	6	26	0.7	0	6	1.94	0.44	0.63	1	6	8	2.83	5	3	13	53
ICDHC15	1	67	1	15	1	123	100	0.6	5	0	9	0	0	0	-9999	-9999	-9999	-9999	-9999	-9999	-9999	38.53	43.6	38	5.6	0	30	0.48	0	3	23	0.3	0	7	0.49	-0.31	-0.5	-0.11	7	3	1.73	2	1	9	68
ICDHC17	1	67	2	19	11	123	102	0.3	1	0	10	0	0	0	-9999	-9999	-9999	-9999	-9999	-9999	-9999	52.55	62	57.75	4.25	0	25	0.9	0	6	27	0.56	0	5	0.49	0.89	0.75	0.71	6	13	3.61	11	2	10	61
ICDHC18	1	68	1	13	10	112	96	0.9	1	0	1	0	0	0	-9999	-9999	-9999	-9999	-9999	-9999	-9999	40.15	50.25	40.5	9.75	0	27	0.78	2	5	21	0.33	1	6	0.49	-0.76	-0.5	-0.26	7	1	1	0	1	10	52
ICDHC19	1	77	1	11	20	103	97	0.85	1	0	10	0	0	0	-9999	-9999	-9999	-9999	-9999	-9999	-9999	9.92	9	7.66	1.34	0	24	0.95	0	5	23	0.44	0	6	0.01	-0.46	0.38	-0.02	6	8	2.83	6	2	14	77
ICDHC20	1	68	2	13	4	101	103	0	5	0	5	0	0	0	-9999	-9999	-9999	-9999	-9999	-9999	-9999	41.2	43.33	42.83	0.5	1	29	0.6	2	6	25	0.41	0	7	0.97	1.19	1.75	1.31	7	6	2.45	4	2	9	61
ICDHC22	1	54	2	20	6	108	99	0.7	5	0	1	0	0	0	-9999	-9999	-9999	-9999	-9999	-9999	-9999	5.82	6	6.5	-0.5	0	30	0.48	1	6	27	0.63	1	6	-0.47	1.19	0.13	0.28	6	12	3.46	9	3	11	60
ICDHC23	1	76	1	13	11	116	101	0.48	3	0	1	0	0	0	-9999	-9999	-9999	-9999	-9999	-9999	-9999	22.04	23.66	20	3.66	0	30	0.48	0	6	25	0.52	0	6	0.97	0.74	-0.25	0.49	1	4	2	3	1	9	53
ICDHC24	1	53	2	17	3	110	96	0.9	1	0	2.5	0	0	0	-9999	-9999	-9999	-9999	-9999	-9999	-9999	47.06	49.14	49.28	-0.14	0	30	0.48	1	7	27	0.52	1	7	-0.95	-0.91	-0.25	-0.7	5	10	3.16	8	2	10	57
ICD01	3	66	1	12	17	105	95	0.95	1	0	0	0	0	0	54	11	14	4	2.5	450	1	52.1	54	76	-22	0	20	1.11	0	6	20	0.41	1	6	0.01	-0.61	-0.25	-0.28	1	21	4.58	12	9	15	84
ICD02	3	66	1	18	15	114	95	0.95	1	0	28	0	0	0	62	5	19	1	2.5	650	1	28.83	30.33	28.16	2.17	0	24	0.95	2	6	20	0.59	3	6	0.01	1.19	1.13	0.78	5	9	3	7	2	7	39
ICD03	2	60	1	11	4	97	95	0.95	1	0	0	0	0	0	37	28	19	1	3	1138	1	30.96	42.75	34	8.75	0	31	0.3	0	3	17	0.26	0	6	0.49	-1.36	-2.01	-0.96	2	3	1.73	1	2	11	46
ICD04	2	77	2	12	4	97	95	0.95	1	0	6	0	0	0	75	2	26	1	3	463	1	33.26	36.66	31.66	5	0	26	0.85	1	4	19	0.33	1	6	-0.47	-0.01	0.13	-0.12	2	2	1.41	0	2	17	51
ICD06	2	78	1	12	7	97	84	1.3	1	0	10	0	0	0	77	1.5	19	4	2	100	0	29.2	27.75	26.5	1.25	0	21	1.08	1	6	13	0.33	8	6	-1.91	-1.51	-1.88	-1.77	1	3	1.73	1	2	12	65
ICD07	2	51	2	18	9	108	100	0.6	1	0	16	0	0	0	48	6	5	3	1.5	325	1	49.53	59	51.5	7.5	0	31	0.3	0	6	27	0.37	0	6	0.01	0.59	0.63	0.41	4	25	5	16	9	4	53
ICD08	2	73	1	16	18	103	81	1.36	6	0	0.5	0	0	0	62	12	33	7	3	310	1	21.77	26.33	33	-6.67	0	11	1.34	-9999	6	14	0.56	2	6	-2.4	-0.76	-1.25	-1.47	1	9	3	7	2	12	64
ICD09	3	71	1	13	12	118	98	0.78	1	0	2	0	0	0	61	10	17	11	3	1559	1	22.56	22	19.16	2.84	1	20	1.11	0	6	22	0.67	4	6	0.01	1.19	0.5	0.57	2	19	4.36	12	7	3	58
ICD10	2	55	1	16	4	101	98	0.78	5	0	30	1	0	0	51	3	10	2	1	360	1	35.28	38	44	-6	0	27	0.78	0	5	25	0.3	0	6	-0.95	-1.06	-0.5	-0.84	7	7	2.65	3	4	8	53
ICD11	3	66	1	11	20	107	91	1.11	1	0	0	0	0	0	55	10	17	3	2.5	313	0	16.41	19	18	1	1	28	0.7	-9999	3	14	0.63	1	4	0.01	-1.96	-1.75	-1.24	1	15	3.87	10	5	13	59
ICD12	3	61	1	13	14	113	99	0.7	1	0	0	0	0	0	55	6	19	0	2	375	1	30.65	29.86	23.14	6.72	0	31	0.3	0	6	23	0.52	0	6	0.49	0.59	0.75	0.61	5	22	4.69	13	9	18	58
ICD13	3	66	1	11	8	112	94	1	1	0	7	0	0	0	50	16	24	12	3	525	1	17.77	15	7.33	7.67	1	28	0.7	5	3	18	0.37	0	4	-1.91	-1.51	-1.88	-1.77	6	11	3.32	5	6	9	59
ICD14	3	77	1	15	14	123	93	1.04	6	0	14	0	0	0	71	6	20	1	2.5	445	1	26.66	25	24.66	0.34	0	22	1.04	0	6	26	0.41	2	4	-0.95	-0.31	-0.25	-0.5	1	7	2.65	4	3	12	54
ICD15	3	68	1	10	10	82	101	0.48	1	70	10	0	0	0	63	4	24	4	2.5	325	1	20.33	18.33	25.33	-7	1	22	1.04	1	6	20	0.22	1	6	0.97	-0.61	-0.63	-0.09	2	17	4.12	9	8	19	67
ICD16	3	57	2	16	17	104	102	0.3	5	0	0	0	0	0	44	13	6	2	2	732	0	25	28	26	2	0	28	0.7	2	6	22	0.52	1	6	0.97	-0.46	0	0.17	2	6	2.45	3	3	11	66
ICD17	3	67	1	18	14	110	98	0.78	1	0	10.5	0	0	0	62	5	7	0	2	613	1	38.16	38.83	43.83	-5	0	30	0.48	0	6	23	0.59	0	6	0.49	0.44	0.38	0.44	6	8	2.83	3	5	17	62
ICD18	2	49	1	18	13	108	103	0	1	0	1.5	0	0	0	37	13	15	3	2	765	0	31.52	37.5	22.5	15	0	32	0	2	6	27	0.56	0	7	0.97	1.34	1.75	1.36	7	10	3.16	8	2	12	61
ICD19	3	62	2	13	8	110	100	0.6	1	0	4	0	0	0	53	9	16	1	2.5	360	1	41.89	45.62	40.37	5.25	0	23	1	0	6	24	0.41	0	6	0.97	1.64	1.13	1.25	6	16	4	9	7	9	59
ICD20	2	63	1	17	10	117	101	0.48	1	0	28	0	0	0	62	2	24	5	3	180	1	42	45.71	45	0.71	0	30	0.48	0	6	28	0.33	1	6	0.49	0.29	0.5	0.43	6	11	3.32	7	4	11	48
ICD21	2	67	1	12	12	101	92	1.08	1	0	5	0	0	0	61	6	31	3	3	350	0	40.91	44.33	35.16	9.17	0	27	0.78	1	1	17	0.33	1	4	-1.91	-2.26	-1.88	-2.02	2	16	4	10	6	10	70
ICD22	2	72	1	10	14	99	93	1.04	1	0	16	0	0	0	66	6	27	2	2.5	738	1	29.19	37.5	22.75	14.75	0	23	1	1	2	19	0.41	0	6	-2.4	-1.36	-0.88	-1.55	1	4	2	1	3	10	47
ICD24	3	45	1	11	-9999	101	97	0.85	-9999	-9999	-9999	-9999	-9999	-9999	44	1	16	2	2.5	100	0	50	61	53	8	0	27	0.78	2	6	22	-9999	0	3	0.49	0.14	0.63	0.42	7	-9999	-9999	-9999	-9999	-9999	-9999
ICD25	2	69	1	10	11	101	99	0.7	1	0	7	0	0	0	64	5	30	6	3	238	0	35.25	37	23.16	13.84	0	25	0.9	1	6	20	0.19	0	6	0.01	0.29	-0.38	-0.02	2	18	4.24	10	8	20	74
ICD26	2	47	1	11	9	94	96	0.9	5	0	5.5	0	0	0	45	3	12	1	2	450	0	35.23	39.83	29.5	10.33	0	29	0.6	0	6	24	0.15	0	6	-0.47	0.44	0.38	0.12	7	19	4.36	13	6	13	68
ICD27	3	68	1	18	12	108	95	0.95	1	10	8	1	0	0	59	8	26	7	3	740	1	36.86	36.86	43	-6.14	0	23	1	2	5	21	0.3	2	6	0.01	0.14	0.13	0.09	1	19	4.36	12	7	14	64

## Sheet: code book
Variable	Description	Score
Code	Participant identification code
Group	Research group allocation	“1” means healthy control, “2” means ICD-, “3” means ICD+
Age	Age (years	"-9999" means missing data
Sex	Sex	“1” means male, “2” means female, "-9999" means missing data
Education (y)	Years of formal education	"-9999" means missing data
ESS	Epworth Sleepiness Scale score	"-9999" means missing data
WTAR	Wechsler Test of Adult Reading Standard Score	"-9999" means missing data
CAMCOG total	Cambridge Cognition Examination (CAMCOG) - total score	"-9999" means missing data
CAMCOG total_log	Log transformed Cambridge Cognition Examination (CAMCOG) - total score	"-9999" means missing data
Marital status	Marital status	“1” means married, “2” means living common law, “3” means widowed, “4” means separated, “5” means divorced, “6” means single, "-9999" means missing data
cigarettes	Number of cigarettes smoked per week	"-9999" means missing data
alcohol	Number of units of alcohol per week	-9999 means missing data
FH_Alcohol	Familiy history of alcohol abuse	“0” means no, “1” yes
FH_ICD	Familiy history of Impulse Control Disorder	“0” means no, “1” yes
FH_Drug	Familiy history of drug abuse	“0” means no, “1” yes
Age at PD onset	Age at the time of PD diagnosis	"-9999" means missing data or not applicable (i.e., PD-related information not applicable to healthy controls)
PD duration	Disease duration (i.e., first symptoms)	"-9999" means missing data or not applicable (i.e., PD-related information not applicable to healthy controls)
UPDRS-III	Unified Parkinson’s disease Rating Scale III subsession – motor subsession	"-9999" means missing data or not applicable (i.e., PD-related information not applicable to healthy controls)
UPDRS-IV	Unified Parkinson’s disease Rating Scale IV subsession- complications of therapy	"-9999" means missing data or not applicable (i.e., PD-related information not applicable to healthy controls)
HY	Hoehn and Yahr score	"-9999" means missing data or not applicable (i.e., PD-related information not applicable to healthy controls)
LEDD	Levodopa Equivalent Dose	"-9999" means missing data or not applicable (i.e., PD-related information not applicable to healthy controls)
Dag_use	Use of Dopamine agonists	“0” means no, “1” yes, "-9999" means missing data or not applicable (i.e., PD-related information not applicable to healthy controls)
BART_overall	Balloon Analogue Risk Task – average adjusted pumps	"-9999" means missing data
BART_Pre	Balloon Analogue Risk Task - average number of pumps on cashed trials immediately preceding a trial in which the balloon burst	"-9999" means missing data
BART_Post	Balloon Analogue Risk Task - average number of pumps on cashed trials immediately following a trial in which the balloon burst	"-9999" means missing data
BART_DS	Balloon Analogue Risk Task – differential score (BART_pre-BART_post)	"-9999" means missing data
TMT-A	Trail Making Test Part A – number of errors	"-9999" means missing data
Divided Attention	Divided Attention hit rate	"-9999" means missing data
Divided Attention_log	Log transformed Divided attention score	"-9999" means missing data
TMT-B	Trail Making Test Part B – number of errors	"-9999" means missing data
Hayling SS1	Hayling Sentence Completion Test - section 1 scaled score	"-9999" means missing data
CAMCOG_EF	Cambridge Cognition Examination (CAMCOG) – executive function subscore	"-9999" means missing data
Kirby	Kirby Monetary Inventory Questionnaire – proportion of delayed reward preference	"-9999" means missing data
Go-NoGo	Go No Go 1/2 number of false alarm	"-9999" means missing data
Hayling SS2	Hayling Sentence Completion Test - section 2 scaled score	"-9999" means missing data
Z_CAMCOG_memory	Z score Cambridge Cognition Examination (CAMCOG) – memory subscore	"-9999" means missing data
Z_LM1	Z score Logical memory I (immediate) subtest from the Wechsler Memory Scale. Recall: story A + first presentation story B	"-9999" means missing data
Z_LM2	Z score Logical memory II (delayed) subtest from the Wechsler Memory Scale. Recall: story A + story B	"-9999" means missing data
Memory_composite	Learning composite score [(ZCAMCOG_Memory+ ZLM1_Recall+ ZLM2_Recall)/3]	"-9999" means missing data
Brixton	Brixton Test - scaled score	"-9999" means missing data
HADS	Hospital Anxiety and Depression Scale – total score	"-9999" means missing data
HADS_sqr	Square Root Transformed Hospital Anxiety and Depression Scale – total score	"-9999" means missing data
HADS-A	Hospital Anxiety and Depression Scale – anxiety subscale score	"-9999" means missing data
HADS-D	Hospital Anxiety and Depression Scale – depression subscale score	"-9999" means missing data
SAS	Starkstein Apathy Scale score	"-9999" means missing data
BIS-11	Barratt Impulsiveness Scale (BIS-11) – total score	"-9999" means missing data
